# Supplementary material for: Switchable Nitroproteome States of Phytophthora infestans Biology and Pathobiology
Source: Front Microbiol. 2019 Jul 16;10:1516. doi: 10.3389/fmicb.2019.01516 (PMC6647872; doi:10.3389/fmicb.2019.01516)
Supplement: TABLE S1 — Amino acid sequence of the identified homologous proteins (matched peptides derived from P. infestans shown in bold red). [file Table_1.DOCX]

Table S2 Amino acid sequence of the identified homologous proteins (matched peptides derived from *Phytophthora infestans* shown in **Bold Red**)

| No. | NCBI  accession no. | Matched peptides (**BOLD RED**) |
| --- | --- | --- |
| **S1** | **PITG_12377** | | 1 | MWTYRGDPYV | PTFVVEIDEL | SGPGSQLSAL | DRKMRNEYFQ | HGVQLGWLID | | --- | --- | --- | --- | --- | --- | | 51 | PRPD**LQRMYE** | **YYLDDN**GDVQ | CSDNSVWRDL | DGGDVLPGFK | MRAPVLEMVL | | 101 | NQDSGSSSED | EVDLLCPSPR | CNKRF**RSYGA** | **CAAHVEW**HRK | ERSISKYLAK | | 151 | RENS |  |  |  |  | |
| **S2** | **PITG_03552** | | 1 | MSGRGKGGKG | LGKGGAKRHR | KVLRDNIQGI | TKPAIRRLAR | RGGVKRISGL | | --- | --- | --- | --- | --- | --- | | 51 | IYEE**TRGVLK** | **VFLENVIR**DS | VTYTEHARRK | TVTAMDVVYA | LKRQGRTLYG | | 101 | FGG |  |  |  |  | |
| **S3** | PITG_07996 | | 1 | MREVISIHLG | QGGIQVGNAC | WELYCLEHGI | QPDGQMPSDK | TIGGGDDAFN | | --- | --- | --- | --- | --- | --- | | 51 | TFFSETGAGK | HVPRAVFVDL | EPSVCDEVRT | GTYRQLYHPE | QIISGKEDAA | | 101 | NNYARGHYTI | GKEIVDLVLD | RIRKLADNCT | GLQGFLVFNA | VGGGTGSGLG | | 151 | ALLLERLSVD | YGRKSKLGFT | IYPSPQVSTA | VVEPYNSVLS | THSLLEHTDV | | 201 | AVMLDNEAIY | DICRRSLDIE | RPTYTNLNR**L** | **IAQVISSLTA** | **SLR**FDGALNV | | 251 | DVTEFQTNLV | PYPRIHFMLS | SYAPVISAEK | AYHEQLSVAE | ITNSAFEPAS | | 301 | MMAKCDPRHG | KYMAACLMYR | GDVVPKDVNA | AVATIKTKRT | IQFVDWCPTG | | 351 | FKCGINYQPP | TVVPGGDLAR | VQRAVCMISN | TSAIAEVFSR | IDHKFDLMYA | | 401 | KRAFVHWYVG | EGMEEGEFSE | AREDLAALEK | DYEEVSAETA | EGEGEEEELG | |
| **S4** | **PITG_06415** | | 1 | MSAAEAETFA | FSADINQLLS | LIINTFYSNK | DIFL**RELISN** | **ASDALD**KIRY | | --- | --- | --- | --- | --- | --- | | 51 | SSLTDASVLD | TDKNLEIKVT | PDKANGTLTI | QDSGIGMTKA | DLINNLGTIA | | 101 | KSGTKAFMEA | LAAGADISMI | GQFGVGFYSA | YLVADKVVVH | SKHNDDEQYV | | 151 | WESAAGGSFT | VTPDTSEPIQ | RGTRIVLKLK | ED**MLEYLEER** | **KLK**DLVKKHS | | 201 | EFIGFPIKLY | VEKTEEKEVT | DDEEEEDEKE | GEDDKPKVEE | VEEEEGEKKK | | 251 | KTKKIKEVTH | EWDHLNSQKP | IWMRKPEDVT | HEEYASFYKS | LTNDWEEHAG | | 301 | VKHFSVEGQL | EFKACLFTPK | RAPFDMFEGG | AKKKVNNIKL | YVRRVFIMDN | | 351 | CEELMPEYLS | FVKGVVDSED | LPLNISRETL | QQNKILRVIK | KNLVKKCLEM | | 401 | FAELAEDNEK | YNKFYESFSK | NLKLGI**HEDS** | **TNRTKIAKL**L | RYHSTKSGEE | | 451 | VTSLDDYISR | MPESQPGIYY | VTGESKKSVE | NSPFIEKLKK | KGYEVLFMVE | | 501 | AIDEYAVQQL | KEYEGKKLIC | ATKEGLKMEE | TEDEKKSFEE | AKAATEGLCK | | 551 | LMKEVLDDKV | EKVEISNRIV | ESPCVLVTGE | YGWSANMERI | MKAQALRDSS | | 601 | TSAYMSSKKT | MEINPLHPII | KSLREKAEAD | KSDKTVKDLI | WLLYDTSLLT | | 651 | SGFSLDEPTT | FANRIHRLIK | LGLSIDDDDD | AADESMEDLP | PLEGEDEEES | | 701 | TMEEVD |  |  |  |  | |
| PITG_19017 | | 1 | MDRDSLVFLA | K**LAEQAERYD** | **EMVDH**MKAVA | NNHNVELTVE | ERNLLSVAYK | | --- | --- | --- | --- | --- | --- | | 51 | NVIGSRRASW | RVISSIENKG | DSERS**EHIKA** | **YRQKIEGELV** | **DICNDILTI**I | | 101 | ENNLIPNSSS | EEGKVFYYKM | KGDYHRYLAE | FQVDDERKES | SDKALESYKQ | | 151 | ASTIAMAELP | PTHPIRLGLA | LNFSVFYYEI | LNSPDRACNL | AKQAFDDAIA | | 201 | ELDTLSEESY | KDSTLIMQLL | RDNLTLWTSD | QEPDNADANQ | GDMNVQDVE | |
| PITG_06514 | | 1 | MADQLTEEQI | AEFKEAFSLF | DKDGDGTITT | KELGTVMR**SL** | **GQNPTEAELQ** | | --- | --- | --- | --- | --- | --- | | 51 | DMINEVDADG | NGTIDFPEFL | TMMARKMKDT | DSEEEILEAF | KVFDKDGNGF | | 101 | ISAAELRHIM | TNLGEKLTDE | EVDEMIREAD | IDGDGQINYE | EFVKMMMSK | |
| **S5** | PITG_02786 | | 1 | MGLLDIVQPG | VLNGEDVVKV | YKYAQEHNFA | IPAVNVTSSS | TVNAALQAAR | | --- | --- | --- | --- | --- | --- | | 51 | DIK**SPIIIQT** | **SNGGAAFYAG** | **K**GIDNKNQNG | SILGAIAAAY | HVRAMAKHYG | | 101 | VPVILHSDHC | AKKLLPWYDG | MLEADEKYFA | EHGVPLWSSH | MLDLSEEPME | | 151 | ENVAISKKYF | ERMAKMNLIL | EVELGITGGE | EDGVDNSDVD | NASLYSQPED | | 201 | ILLAYNELGS | VSPYFTIAAA | FGNVHGVYKP | GNVK**LHPEIL** | **GDFQK**YVAKE | | 251 | KSLSTEKPVF | FVFHGGSGST | PQEIQTAVGN | GVVKMNIDTD | TQWAYWNGLR | | 301 | **KFYEEK**K**DYL** | **QGQIGNPDGP** | **DAPNK**KYYDP | RVWVR**KSEET** | **MIARLHEAFR** | | 351 | DLNCVNVL |  |  |  |  | |
| PITG_03551 | | 1 | MARTKQTARK | STGGKAPRKQ | LATKAAR**KSA** | | **PATGGVK**KPH | RYRP**GTVALR** | | --- | --- | --- | --- | --- | --- | --- | | 51 | **EIR**RYQKSTE | LLIRKLPFQR | LVREIAQDFK | | TDLRFQGSAV | LALQEAAEAY | | 101 | LVGLFEDTNL |  | | |
| PITG_15492 | | 1 | MAPKIRHAAP | AFTADAVVDG | EFKTVSLSDY | KGKYVVLFFY | PMDFTFVCPT | | --- | --- | --- | --- | --- | --- | | 51 | EIIAFSEKAA | EFRKLGCEVL | GCSVDSKFSH | LAWINTPRKQ | GGLGELDIPL | | 101 | LADFNKEISQ | AYDVLIDVGE | ETGATFRGLF | IIDGEGKLR**Q** | **STINDCPVGR** | | 151 | NVDEILRLVE | AFQFTDEHGE | VCPAGWKKGK | KTIKPTVDAS | KEYFEAAN | |
| **S6** | **PITG_11795** | | 1 | MSKYSKTYLA | LAPVADPTAR | EHLLHAAAPA | IDAGTPINDD | FLLSARIERQ | | --- | --- | --- | --- | --- | --- | | 51 | LREIEAQRGM | VTRHEVLAAT | IREHAILMEH | AEVEYPKAVA | PTVMPSAQLI | | 101 | PNSIYKPSYA | QVTHCIPSQR | HFSSSAVEAE | LQSVKWPSDL | AKRVHRRMRS | | 151 | FPRNYEAKEL | VVEAGMNQAE | WAIAAASFRK | SFLSEPSKYF | KNQQE**LLAFG** | | 201 | **RDLDDVK**RHN | SFIFYPYFVD | YAKANSYLPT | DQDNDNVLSL | QQLTDLRLPH | | 251 | EMYPFATAMK | RKIIYHEGPT | NSGKTHQALE | RLKQAGEDGG | IYCGPLRLLA | | 301 | LEIFERLNAD | GLYTSLVTGQ | EKKLVPYSTH | VSCTVEMANI | NRPWDVAVVD | | 351 | EIQLIGDPQR | GWAWTRALFG | LQANEIHVCG | SGEAVHLVKK | FAETTGDDFE | | 401 | LRSYERRSPL | EIAPTHLASY | SHIRSGDCVV | AFSRRDIFQI | KRDIEVKTGQ | | 451 | KCCIIYGQLP | PETRSQQARL | FNDRNNDFNI | LVASDAIGMG | LNLNIRRVVF | | 501 | ATVK**KYSGSS** | **GGMID**IPPSL | AKQIAGRAGR | YGSDFASGEA | TCVLEEDLEY | | 551 | LKESYDEVPT | PLTSAGLFPS | SEQMEEFARQ | LPGITDLADL | VDKYVMLARL | | 601 | DGDYFMCNHQ | DMKDAATLLR | ETELTLSDRF | TFCMSPVGLR | NPLARRVFLE | | 651 | YARAHSLGQS | VRLDIYLPKY | APRTAEALGD | VEIKAKIIDL | YLWLSFRFED | | 701 | TFVEKDLALE | LKTRVLELVE | QGLVNTTYHR | EDK**KTRWSSG** | **AANGRRSASR** | | 751 | **GQF**DGDRFRQ | QTKDGDSRPN | WRRDKTTRQP | AQASRRTNTQ | REDGAEGLKE | | 801 | TEDSNMSWVA | RMFGTSK |  |  |  | |
| **S7** | **PITG_00319** | | 1 | MAMSFIWSLV | HACREGMLCY | SWLMSKVDEQ | FLNEGACALA | KRM**VDAWPFE** | | --- | --- | --- | --- | --- | --- | | 51 | **RLPGF**GEGFD | LDWTHLYCAR | SECWYHDSLI | NALMMTLAEN | FKNNTTLFLP | | 101 | PLYTPAPSKC | KRIPPRTLSL | VAAADKDLVF | MPLNINGKHW | VCLVLDRPRT | | 151 | TIYCYDSFDK | RSNQIMLAEL | AEEIGRKALS | DSDNCGLFII | LHFW**RRFVKE** | | 201 | **MGSDYT**TVGL | LRRRWDVLRT | VVDFSDASKG | EQD |  | |
| **S8** | PITG_05757 | | 1 | MGRIARLELE | NFKSYGGYHV | VGPFHRFTAV | IGPNGSGKSN | LMDAISFVLG | | --- | --- | --- | --- | --- | --- | | 51 | VHSRQLRSNQ | LRDLVHKAPT | DTATTGRSAF | VTLVYELSAD | ETPPSKSLAA | | 101 | QNQQKEVKFT | RLISEKGAGS | YRIDGQDVSS | EGYQNQLKEI | GILVKSRNFL | | 151 | VFQGEVESIA | SKSPTELTKL | FEQISMSDEL | KNEYERLMEE | KDAAEESTIF | | 201 | AYKRKKGLVA | EKRLVREQKE | EAEQFRHKQD | AVNDLRVEHY | LWQLFQVEDD | | 251 | MTQREETVRQ | YQGARRTCSQ | KEEDVAQTYR | EKKKELNASL | REVKTNRKRI | | 301 | QDLQSEMEDI | QPQVIRLREQ | TQYSQRKIVE | SETTEKQMKE | RQEGKAKEIE | | 351 | GLKTDLQELE | KVKAELEAKQ | AKEASQRGEE | GSLVLEGSRL | DEYHRIKEAV | | 401 | QVKTNLLRNE | LESILRQQNA | DKNKVETLSQ | ERQENLKMIE | MLSDDLKQAD | | 451 | ERVVSMQCVI | SDTERDIADA | EKSLQTADDE | KRGQAEEKEK | LTKQLERVNN | | 501 | KLRDLKDDKR | QSQAEARRAD | TLETLKRLYP | GVRGRLVDLC | KPTQRKYNMA | | 551 | VTVATGKHMD | AIVVTDYRTG | QECIQYLRDS | RAGSAQFIPL | DKIRVKPINE | | 601 | RFRGLGNNIK | MVVDVVQCDP | ENEPALHYAV | GDTVVCETIE | VARDLCFRQN | | 651 | EKLKAVTLNG | MVVSKNGSMT | GGKTQNDLRR | AGRWDEKEVE | ALQQEKDKLI | | 701 | DAIRAIERHG | ASYAKLQTQR | TQIEGLKSRL | THAKADLVIT | ENKRPKIQLR | | 751 | IDEAKKRVSE | VIEPELGKFA | AAVESRRAKI | DALQDQIHGV | EDEMFADFSE | | 801 | AIGVDSIRVY | EERVLKRHHK | AMEMRRKITE | HEAKLRAQIE | YLESQDFNQP | | 851 | MLAARERATR | EAQHLKTLVE | EEAALMKTFA | VLRKERKEHE | ALRQTLSTKV | | 901 | EELEKALREI | GSKKAKYEQR | KGKIQRRISS | EETVLERLKD | HKTELFK**RAA** | | 951 | **LDQIK**LPTVA | RSGSEDIEME | DASASSSLEN | TELLLGADAA | NRQVDFSSLS | | 1001 | DAHVVVDDKE | FDEINADYEK | RIGLLLTELE | QIQPNMRALD | KFDVIQSRIG | | 1051 | KEEEELDRIK | QQALDTASKF | EKVKQTRRDR | FMEAFTHISG | VIDSTYKQFT | | 1101 | KSSKHPLGGT | AYLNLENTEE | PYLSGMKFNA | MPPMKRFREM | DELSGGEKTV | | 1151 | AALALLFAIH | NYRPSPFFVL | DEVDAALDNV | NVNKVSTYIA | NCGFQCVVIS | | 1201 | LKDSFYEKAD | ALVGVCRDIT | LQQSKSMTLD | LTKFD |  | |
| **S9** | PITG_12490 | | 1 | MRSP**VTLLLL** | **TLSFIFFNGE** | EEATTATTEV | SPESPWGRIY | LRNGLAPIQY | | --- | --- | --- | --- | --- | --- | | 51 | LRDDFGGPMT | SREVSLYFPK | RRKNRFGCEL | LPESESMEVE | AANRSVVLVV | | 101 | DRGECTFEH**K** | **ALLADQMGAA** | **ALLVVS**PTDD | VSAPVAALKN | DEEISIASVM | | 151 | IRRTGGDMLR | IAAEQMTIYG | RFIPMTCERK | P**YTCKPRYAD** | **EEDYI**ESAIA | | 201 | RSGVVLSVDK | KGDDGTQVGT | FLAATYGSVL | PTKMPFLLAA | PLDGIQACTD | | 251 | ATKDSATHSE | FEGKVVLIPA | GLAGKCSEFE | KVSNAQRRGA | NVVVLMQQDN | | 301 | ATITTQPGVP | VSWHAYNITI | PVLAVSSTTG | ANLAGLKDAH | GDAARLRFAV | | 351 | SNGIADAWEL | LKQYSTRSSW | PKRVKRCSKT | LAQLLYQLRG | FGGDIEVEEA | | 401 | LKSMFLNVVS | GSLQDWEKIA | HPDQDADQDH | ETQKRSSSEK | IVQTVEKSET | | 451 | RDEF |  |  |  |  | |
| **S10** | PITG_06815 | | 1 | MKSVARVAQK | TLSQARGFRT | SAAVANAAEE | PAMARVYGGL | KDEDRIFTNV | | --- | --- | --- | --- | --- | --- | | 51 | YGEDTWRVDG | AVRRGDWHRT | KDLLCMGPDW | IVQEIKDSGL | RGRGGAGFPS | | 101 | GLKWSFMPKQ | TDGRPSFLVV | NADESEPGTC | KDREIMRKDP | HKLVEGCLIA | | 151 | GFAMRARAAY | VYIRGEFFNE | ALILQEAIHE | AYQRGFLGRN | CGSGYDFDV | | 201 | YLHRGAGAYI | CGEETGLLES | LEGRQGKPRL | KPPFPANTGL | YGCPTTVTNV | | 251 | ETVAVSPTIL | RRGGSWFASL | GRK**NNHGTKL** | **FCISGH**VNNP | CTVEEEMSIP | | 301 | LRDLIERHCG | GVRGGWDNLQ | ACIPGGSSVP | VLDEELCQDI | MMDYDDLKQR | | 351 | GGSGLGTAAV | TIFDKSVDMV | GAIRRYSHFY | THESCGQCTP | CREGTGWMEK | | 401 | VLTRMETGDA | ELEEIPMLEE | ISRQIEGHTI | CALGDAAAWP | VQGLIRK**FKH** | | 451 | **KLVERIED**PS | SFKPEDYFQK | AWPGAPLKNQ | EWVDKFADGS | AYKSQASA | |
| **S11** | PITG_01938 | | 1 | MVAINDPFMD | LEYMAYLFKY | DSTHGK**FDGS** | **VATKDGNLVI** | **NGEVIHVFTA** | | --- | --- | --- | --- | --- | --- | | 51 | **RNPAEIPWGK** | **AGATYVCEST** | **GVFTTTEK**AQ | SHIEGGCKKV | VISAPPK**DST** | | 101 | **PMYVMGVNHK** | **EYDGSAPVVS** | **NASCTTNCLA** | **PLAKVINDNF** | **GIVEGLMTTV** | | 151 | **HATTATQLPV** | **DGPAK**GGKDW | RGGR**GCGQNI** | **IPSSTGAAK**A | VGKVLPVLNG | | 201 | K**LTGMAFRVP** | **TPDVSVVDLT** | **CR**LEKAASMD | AIKAAVKAAS | EGELAGILGY | | 251 | TEDQVVSNDF | LHDKHSSTFD | ADACIALNDH | FVKLVAWYDN | EWGYSNRLVD | | 301 | LVLHMATVDI |  |  |  |  | |
| **S12** | PITG_06853 | | 1 | MQRGLLRLSR | AALNNHQHVP | TAIRTISSTP | PNSGPGRRRP | SRTQVIDDIG | | --- | --- | --- | --- | --- | --- | | 51 | ALVHEAKRQG | PRFQPSMDYL | R**RASAVLQLC** | KGREQCTAAI | PLCHIVEKAQ | | 151 | NTHSKAEMEC | VRIYQKAGRN | QEVVALAEKL | MSQDVFLLNP | ALASAIQACA | | 201 | AVGDM**DKGFH** | **FFDVAVKRG**S | IPNLSVYSAL | LAVAGATGDP | KRVQTVLTQM | | 251 | QDAGVEMNDI | TFHNLMSAYA | RGGHVTEALA | LF**DKMQKQGI** | **PADEHTY**AIL | | 301 | **MDAHAESGDF** | **EGANALMEEL** | KKASIGPNLV | HYNVLLKACG | KVRNLTSAFQ | | 351 | LYEEMKERKI | QPDLVTFITM | MHAVYHGELG | AVDQKKVKAA | LVGMGVMGAA | | 401 | FIPFINYEEY | MMTTLFCGSL | VGSMGLAAYM | NPDGVI**RALY** | **PNTDEPRD**DT | | 451 | IIEAFFRRLR | EEDHSGRSMY | LWREMLKFNV | PADPRVYDVL | VRTCVRKRHP | | 501 | ELAYEAVFEE | KLPLTDKEGS | FVLNLPTTLS | LHSLLAQKR | FN**MADTLYDA** | | 551 | **ARGHGVFDKV** | **FSEKGD**VYVY | DMRSFLNEQV | RSYAIIKLLD | ELRTKVDSSK | | 601 | GQFVAPNVQF | LVQHGYELLD | RLDADNTSLR | TLFSMDDMAR | IGASGDNSTS | | 651 | ANYMYYFRLA | IPTERLQKYF | ETTPANAGKE | RRL |  | |
| PITG_15078 | | 1 | MDDDIQAVVI | DNGSGMCK**AG** | **FAGDDAPR**AV | FPSIVGMPKH | LGIMVGMNQK | | --- | --- | --- | --- | --- | --- | | 51 | DAYIGDEAQA | KRGVLTLRYP | IEHGIVTNWD | DMEKIWSHTF | YNELR**VAPEE** | | 101 | **HPVLLTEAPL** | **NPK**ANRERMT | QIMFETFNVP | AMYVNIQAVL | SLYASGRTTG | | 151 | CVLDSGDGVS | HTVPIYEGYA | LPHAIVRLDL | AGRDLTDYMM | KILTER**GYSF** | | 201 | **TTTAER**EIVR | DIKEKLTYVA | MDFDEEMEKS | TRSSALDKTY | ELPDGNVIVI | | 251 | GNERFRTPEV | LFNPSMIGRE | CSGVHECAFQ | TVMKCDVDIR | RDLYSNVVLS | | 301 | GGSTMFPGIG | ERMTKEVIKL | APTAMKVKII | TPPERKYSVW | IGGSILASLA | | 351 | TFQHMWISKT | EYDESGPSIV | HRKCF |  |  | |
| **S13** | PITG_02284 | | 1 | MPPHSATPSS | PVATAGVRRD | LLLYVNGERI | EISERDVHPE | QTLLQFLRHD | | --- | --- | --- | --- | --- | --- | | 51 | LGLAGTKLGC | GEGGCGACTV | MVSKFDVATG | RVRHVSVNSC | LAPFCAMDTC | | 101 | AVTTVEGVGT | ITGATGEATG | LHEVQKVLAE | SHASQCGYCT | PGFVMALYSM | | 151 | VKQRESGVEL | TMEDIEHGMD | GNLCRCTGYR | PILDAAKSFG | DDAGEAHCKG | | 201 | TCPGCPNAKN | GDADVDIEDL | HGDNHQEVTS | CSSRKIRELA | KHCQLREKHD | | 251 | VDTVTGASKN | TKALAVSSFP | NELMEKAMAP | QTLQIDGKYI | QWFAPVTITH | | 301 | LLQLKKQHPD | AKISVGNTEM | GIETKFKGFK | YAHLINVSRI | PELVATKDVT | | 351 | QTDPINQTVF | SGAEPFEGVK | LGAAVTLTDV | KQQLSELIKT | MPVYQTRAFE | | 401 | SIVKMLKWFA | STHIRNVACI | AGNLVTASPI | SDMNPLLAAM | NAYIELQSTR | | 451 | GTQYTRVRDF | FLSYRKVGME | PDEIITAVYV | PYTKKWEYML | PFKQARRRED | | 501 | DISIVTAGIR | VRLECSGDND | AWIIQDASAV | YGGMAPITKS | AAETEQFLIG | | 551 | KTFNASTFGE | ACDVLHSSDF | ELPDGVPGGM | AKYRESLCSS | FLYKFYVASS | | 601 | ERLQLDLQAI | KATGSLLSDA | PVVDSTMQSA | GTSFLHQVRP | VSHGTQRFGR | | 651 | ETGGLQDSKH | QPIGDAKTKR | GPVGDPLMHK | SAYLQVSGEA | LYTDDIPNTP | | 701 | GTLHGALVLS | TCAHGLIKSI | DASEALAMEG | VHRFFDASVF | ETEKLGSNKI | | 751 | GPVLKDEECF | ASKEVLCVGQ | PVGIIIADTH | ELAMAASDQV | QVVYEEL**PSV** | | 801 | **TTIEEAIREK** | **SFILPAHTIN** | **SGNVE**TGLAE | SDIVLEGEVH | MGGQEQFYFE | | 851 | TNVSLCTPQE | GGMKVISSTQ | AATKAQVLVA | RVLGINSNRI | TSTTKRIGGG | | 901 | FGGKETRTVF | VTCAAAVASH | VMKRPVKCLL | ERHVDMLTTG | GRHPFYAKYK | | 951 | VGIKQDGTIL | ALDVDIYNNA | GYSMDLSLAV | MDRALFHCEN | AYKIPNLRCH | | 1001 | GTVCRTNLAT | NTAFRGFGGP | QGLFIAETYI | DHIARTLKLS | PEDVRTRNMY | | 1051 | VEGQTTHFGQ | PLEDFNLRTL | WQHTIDRSGF | EAKKAEAEVF | NKNNRWKKRG | | 1101 | VAILPTKFGI | SFTSKFMNQG | GALVHVYADG | SVLVSHGGVE | MGQGLHTKVI | | 1151 | QVAARAFGIS | HELVHIEETS | TNKVPNSQPS | AASMSTDLYG | MATLDACEQI | | 1201 | LARLAPVRQR | LGPDASFSDV | TNAAYFERVN | MSAQGFYIIP | NERCGYDFSK | | 1251 | SVDENIAVGT | AFNYFTTGVA | CTVVELDVLT | GDFHMLSVDI | LMDLGASINP | | 1301 | AIDIGQIEGA | FMQGFGLFAL | EELVWGDNGH | PWVKRGNLFT | RGPGAYKIPS | | 1351 | ANDVPLDFNV | WLESNQKNKF | AVHSSKAVGE | PPLFLGSSAF | FAVKEAIYSA | | 1401 | RADAGHHGYF | ELRSPVTPER | ARMACADEML | KKVFTARGGD | MVSYQPSGSF | |
| **S14** | PITG_05074 | | 1 | MRHHQRAALI | LIALACLLAM | SAAVIDDQRF | ALNGRTLRTS | MTSDDEKDDD | | --- | --- | --- | --- | --- | --- | | 51 | DRMVDLSGLG | QSAKLTELGA | LKDIKMKPIA | ALTLSKLDEA | GDDLFTSPKF | | 101 | KTWVNYVASV | AEK**HSTTTMM** | **SKLTAQYSDG** | **SLIR**MLEAAK | KVEGANEIAL | | 151 | RLQQRQVRTW | IKAEKTADDI | FELLKLDEGI | EKLLTNSNLG | TYVSYMNLFN | | 201 | KYSPGKETTL | VNTFVTYYGD | EAVAKTIEA |  |  | |
| PITG_23137 | | 1 | MRLIAGVLAG | FLIICEATSA | SESDHTMAYQ | TAGTDNTQPT | DAVENSIASK | | --- | --- | --- | --- | --- | --- | | 51 | RF**LRADVVMN** | **RGVERIF**EAL | KNLLPGAKIF | AKDGASFSGT | FVRKMLGDKA | | 151 | FRKQEFERWI | RSDIDGTALR | RMLGDMNKKG | RAELLNRYTA | FLGSKDGLVY | | 201 | YKPGPIA |  |  |  |  | |
| PITG_15764 | | 1 | MRSCFVLIIF | LAGICKCLSL | NWSGNTLKER | SHTSTNSLPS | PPFISTIKTP | | --- | --- | --- | --- | --- | --- | | 51 | KRFLRSYDAP | KQDNIGHDTD | ERAGISGIAM | IDDLAYKWAL | KNTRDPMDAF | | 101 | QRLHVVKTGG | KLEGNKEFIR | WLQYVNRYKA | TRRVKFGEDE | LLSLLMKTRA | | 151 | EEELVSLFQS | LRQYPDITKM | ASDMQASMIL | SSASSHRLIN | EAWLMSRETP | | 201 | GEVFKILRLG | DNSISRLENN | PLFIQWLRYV | TMYRAVHGRI | WKHYLSVSRL | | 251 | YHNLNFLIQS | LQNFPDLEK**L** | **ALSLQTHLYR** | KWMIEIQLTP | SELLGLLETT | | 301 | RVARSDPKYR | NLEAYTMYFA | ESRGGTPLLN | KLKTLFTDVD | PYAALSAASS | | 351 | A |  |  |  |  | |
| **S15** | **PITG_13116** | | 1 | MARTYLIGGN | WKCNGTVQSV | K**DLCALLNK**V | EITSDKVEVI | VSPPALHIDL | | --- | --- | --- | --- | --- | --- | | 51 | AKSLLQKKIA | VSAQNVSLTG | TGAYTGEIAA | EQLVDFGLEW | TITGHSERRA | | 101 | YYNETDEIVA | KKTKRALDLG | LKVIFCIGES | LEEREGNK**TM** | **DVLIR**QTQAL | | 151 | ANIVTEADWA | RIVIAYEPVW | AIGTGVVATP | AQVQEAHKDL | RGWIAGK**VSP** | | 201 | **EVAENVRIIY** | **GGSVK**GDNCE | ELIALADVDG | FLVGGAALKP | EFEKIIKSAF | |
| **S16** | **PITG_17261** | | 1 | MGLSQERKLE | YFDK**LESLLE** | **NYTKIFLVGV** | **DNVGSAQMQQ** | **IR**LVLRGR**AE** | | --- | --- | --- | --- | --- | --- | | 51 | **VLMGK**NTLMR | KVFNNFVKKN | PGHPLELFIP | LLK**GNVGFVF** | **TNDDLSEIRE** | | 101 | **VLESNR**VPAP | ARVGSIAPVD | VIVPPGPTGA | DPGQTSFFQA | LQIATKIQKG | | 151 | QIEIVTEVML | TRKGEK**VGNS** | **EAALLQK**LDI | KPFSYGLVIE | QVYDNGSIFD | | 201 | PAVLDLTEAD | LCAKFVAGLR | NVAAMSLELG | IPTLASIPHS | IANAFKDLVA | | 251 | IAVECEEFSF | EKAEPYK**AFL** | **ADPSAFAVAA** | **PAGGAAATEE** | **K**KVEAVEEEE | | 301 | EVDMGGGMDM | FGGGDEDY |  |  |  | |
| **S17** | **PITG_09556** | | 1 | MAETSIYPRA | ELDGHNGKAV | TAIATTR**ENP** | **NLLLTASR**DK | SLLVWQLSND | | --- | --- | --- | --- | --- | --- | | 51 | GEEYGFARRR | LQGHSHYVED | VVISSDGQFA | LSGSWDGTLR | LWDLNTGITT | | 101 | RRFVGHTKDV | LSVAFSADNR | QIVSGSRDKT | VKLWNTLGEC | K**YTITEDGHT** | | 151 | **EWVSCVR**FSP | STANPLIVSC | GWDKVVKIWN | LSNCKLR**TNL** | **FGHEGYLNTV** | | 201 | **TVSPDGSICA** | **SGGK**DGTANL | WDLNEGKRLY | SLVAGDVIHA | LIFSPNR**YWL** | | 251 | **CAATTSGIK**I | WDLESK**IVVH** | **DLQPEIEEPK** | GKYAQPPHCI | SLAWSADGSV | | 301 | LFSGYTDGIV | RVWAVGN |  |  |  | |
| **S18** | **PITG_02256** | | 1 | MLSPRAIQSA | RGVATKAATG | KWLASVPMGP | ADPILGLTDR | FNKDTDSRK**I** | | --- | --- | --- | --- | --- | --- | | 51 | **SLGVGAYRDD** | **DGKPFVLPSV** | **LEAEK**RIMAA | GKNK**EYAGIA** | **GMK**DFVDLSL | | 101 | EFAYGEDCEA | LKEGR**ITGVQ** | **TISGTGGVRL** | **AGEFFNK**FLG | KNTPVYLPNP | | 151 | TWGNHIPIMK | NAGMEVR**RYT** | **YFEPASR**GLD | FKGLMNDLEG | APDGSVFLLH | | 201 | ACAHNPTGVD | PTIEQWQEIA | DLMKTKKHVP | FFDCAYQGFA | SGDASRDAAA | | 251 | IRHFVK**EGHN** | **IFLSQSYAK**N | FGLYGERVGA | LSVVTDSKEE | AERVQSQLKI | | 301 | IIRPMYSNPP | IHGSLIVSTI | LSDAQLKKQW | YSECKAMADR | IISMRTALRS | | 351 | AIEKIDATNG | VQSNWNHITD | QIGMFCYTGL | TEAQVAR**MMD** | **EHHIYLTK**DG | | 401 | R**VSMAGVTTK** | **NVEYIAKSIT** | **EVVQNA** |  |  | |
| **S19** | **PITG_14492** | | 1 | MVKYVLTGVG | GNIGGHAADH | AVEIKKPEDV | LVLTSSDVSK | LNPERVAAWK | | --- | --- | --- | --- | --- | --- | | 51 | AKGAIVEQAD | YLDVDSLKKV | FEGAEAIAFI | STWLIGDGRR | GQMKNCIKAA | | 101 | KETGVKRVCY | TSFVGAGSDK | PNEEVPFLPQ | DHQFTEQQIY | ASGLDYNIQR | | 151 | **DYLYQDNTPR** | FFAQSWHFTE | DRWLSNSHDV | PGAYVAISDC | GRVFAALLLG | | 201 | KQEK**NTVVEV** | **TGPEAVTDR**D | MFEWMNSISG | YK**GQFVDLPD** | **EELR**AYWLGR | | 251 | GLPTDVYGDF | SKLPMKLCIG | DLLCCGEMLA | NGSMSK**VTDT** | **VER**LTGRKPL | | 301 | GYKENLLQYK | EIFPKNQ |  |  |  | |
| **S20** | **PITG_07671** | | 1 | MLSSLSRRSH | PVVPAIARAS | SSLMSDVHGT | THGKKHWKNK | PLFRRGGDKK | | --- | --- | --- | --- | --- | --- | | 51 | FR**NGQEAADM** | **LTDEVIR**RDP | NQAEYVQAVQ | NFVNSVVPVF | DRYPKYAWVM | | 101 | KTLMEPERLI | QFR**VPWIDDE** | **GSSR**VNRGFR | VQFSSALGPY | MGGLRFHPET | | 151 | THGTAKFLGF | ETIFR**NALAG** | **PYGGAHGGSD** | **FNPMDKSESE** | **IMR**FCQSYMT | | 201 | ELVNYIGPHT | DVPTAGVGVG | PQEIGYMFGQ | YKRMRQLHPG | GTEGILSGGA | | 251 | YHYPQVTGYG | VAHFANRILE | TRGETLKGKR | CLISGSGTVA | LNVARKLLDF | | 301 | GAIPIGMSDN | FGYVIEDQGF | SSKSLEELKR | IKEERNARLG | AYIMSSTTAN | | 351 | YHPSEEGRLW | ETPCDYAFPC | AIQNDVDADA | VRLLVKNGCK | GIFEGANFPC | | 401 | TDEAISLIKQ | HGLAFGPNKA | SNGGSFALIT | KNLGSSTQML | DDEVDVIVKE | | 451 | YMDKLHDRVA | ASAEEFNAGG | DLHVGANITA | FMSVAAAMFR | QGVV | |
| **S21** | **PITG_13946** | | 1 | MTKSIEEIYG | EHCIQHIKSV | DKYDETKLGD | SRVLSPSIWI | KSKMHVVGDS | | --- | --- | --- | --- | --- | --- | | 51 | INYKHSDDGT | PDFGNDGYTY | LLQYQFNELD | KSQMLNNFFF | KSNEDRESFE | | 101 | QANVECGVEY | FLATQSYDER | LYQLCMMIRG | DLFSNNQNVW | NLAGFFARQP | | 151 | HSDWHLVRKT | YLCVLKQKSR | AFQ**QGLVELT** | **GRTINDMR**SA | MVDTSFENDE | | 201 | LEYWAEKYLV | IENKPNPVDP | NDNKMRLTCI | LAVLVAVTFH | ATGNANSAVA | | 251 | GKASNEYGVD | MITTTAIFVE | NPRRKHLFIL | GADATSQEAF | HRVVVLHPRG | | 301 | FPLLPRQVER | QSGWINFEAI | IDVFLLVHMA | FCSALTFALL | AIFTGNTVPS | | 351 | PYTAHSNSTS | AIFVRKVLD |  |  |  | |
| **S22** | **PITG_10210** | | 1 | MFTSALRASL | RVQRLGAMKM | AQSSPAFSSS | FGLRTFANAT | AASLGIDK**FG** | | --- | --- | --- | --- | --- | --- | | 51 | **VTNAK**TQVHR | **NLSYDEIAVH** | **EEK**NGEGHFV | KNGTYTIDTG | KFTGRSPKDK | | 101 | **FIVDQAPSSK** | NIWWGDINQP | VSPEVFDELY | ETVSEHYGQA | EK**VYVFDGYA** | | 151 | **GANPASR**KKV | RFITELAWQH | HFVTNMFLRP | QTK**EEIADFK** | **PDFTIVNACK** | | 201 | VTNKNYKKHG | LNSEVFVAFN | IEKDVAVIGG | TWYGGEMKKG | IFSMMNYWLP | | 251 | LDGIMAMHCS | ANKGK**NGDTA** | **LFFGLSGTGK** | **TTLSADPHR**Y | LIGDDEHGWD | | 301 | DEGIFNFEGG | CYAK**TINLSA** | **ENEPDIYNAI** | **K**R**DALLENTY** | **VDAETKEPDF** | | 351 | **YNTSK**TENGR | VSYPIYHIPN | HEPTSSGGHP | NNIVFLTCDA | YGVLPPVSK**L** | | 401 | **SDGQAMYHFL** | **SGYTAK**VAGT | ERGVTEPTAT | FSACFGAAFL | PLHPTKYADL | | 451 | LQKKLQKHNT | SVYLVNTGWT | SGGYGVGKRM | SIKDTR**ACID** | **AILDGSIKNS** | | 501 | **EFLEDPNFGF** | **SVPKKLGEIP** | **ENVLNPR**EAW | SDKEAYDVTA | KK**LAGMFQEN** | | 551 | **FK**K**YVSPGVT** | **DYSK**FGPKL |  |  |  | |
| **S23** | **PITG_06059** | | 1 | MRLTYVLLAA | ASTLFARHVT | STPYFANDVA | LTGVLSLGFI | HFVGADQSVS | | --- | --- | --- | --- | --- | --- | | 51 | DQSRFLRGGS | IDEDDNEEIN | FLELVKQAMT | NNFVNKLMKK | SSFSDLEKID | | 101 | DFGELKRIST | IIDDKLNNLF | KQADDA**NKSP** | **DELAK**ILKEM | PDVDDALTAK | | 151 | TLEMYTDYLK | AVGVRVPT |  |  |  | |
| **S24** | **PITG_10292** | | 1 | MLRIVSRFNQ | PARRVMQTSG | KSLAGAHNLQ | CRCGNCVQHP | TGCTCPRCQS | | --- | --- | --- | --- | --- | --- | | 51 | RSFSVKSQSH | YDIPKTQTAV | VFEDNNAPLQ | VRKDWPVTQQ | KDLKPGEVLV | | 101 | RLAYSGVCHT | DLHVWLGDWP | LDNKLPLVGG | HEGSGYVAAI | GDHSYTNLKI | | 151 | GDPVGVKWLA | NSCLGCEDCR | KGHESTCIDA | DLHGFTVDGS | FQQWCVSFAD | | 201 | HVTPIPTDLP | MHAAAPILCA | GVTVYKALKE | IGGQCGDFVV | IPGAGGGLGH | | 251 | LACQYARAMG | YR**VIAIDSGD** | **DK**RKLVASYG | IKDFIDFKEG | NVKDKVFEAT | | 301 | EGRGAHATVV | VASGGEAYKD | ALSFLRPHGA | VVLVGLPKDT | YITAEVFGSV | | 351 | LNAHR**IIGSY** | **VGNR**QDSIEA | LK**VAAAGDVN** | **TTYK**IEKLEN | LPDVFQRMAD | | 401 | GKLAGRIVLD | **CE** |  |  |  | |
| **S25** | **PITG_12548** | | 1 | MESAPVDDGL | VFLPQASSGL | ELLCVALYLS | LALVAACRAL | SQGSTFHRSQ | | --- | --- | --- | --- | --- | --- | | 51 | RSTFQRLMVL | FAVTRAASFV | SEGLARNLLN | RAALCLFFSL | VLFQTLLWID | | 101 | IANPKVSTRS | RRIWIAFVVA | NGLFYAAVLG | LSVMHEAKVA | QARHSKSRLN | | 151 | RSTLWTGVLP | VLFIATGSFV | SSLGLVYSTW | KMRHRVERVL | KPSGNGLRRR | | 201 | LDERVEKKLT | SALRFTSVVM | GACSVLFFLR | TIIYVQRPFS | HQGCGDIHSP | | 251 | DVCVVVGYVI | PEIVPCVLFL | VLMWEVEPTL | EIPSRRSLSY | TKGRVTSETT | | 301 | PLLDNEAMPP | PLLVAAKEFT | DRIGTASKSA | VTQPNSPPGS | QSGYFTVGRR | | 351 | PSPLSLGLGN | GVLGRARRRL | ELVVRQHLGG | ASNEQHSDDP | WRWPAQSASS | | 401 | TPCAWFSFQC | FNLTLPSKSS | VTSSSFVVLH | LMNAETGAVI | AEIGRTEISH | | 451 | SEDPCFHMML | AVDMREQDLL | RASVYSVRNP | NSLQNLDSQW | LVGDPLVPLS | | 501 | SFMTGSLPTI | GRAAIFSLYS | PLSRTRSSGE | IVIRCEAEVK | GLHAGMSTDG | | 551 | LERITRSFMY | IGIKSTDAED | HDDSAYSEIA | QQMINLASTS | QRSQGKVLVE | | 601 | EELIESVYTW | EVPYQLLQLI | **LSDLLMKLDS** | **LKR**EIALEDG | DESSSSTPSS | | 651 | QLSTPSVGGY | SMPSVITTPR | ALGTNRVRPA | TSIGMLSEMI | IQIQDDAIER | | 701 | KKRKWRLDLV | KTMEQYISEV | EDSILRYGAT | QHAGLTFKPS | TMKADADLRF | | 751 | LALNLHQQLL | TVGNAAPTSE | KDVQYGDQSS | AARYARLVNS | FVGTLLSSPL | | 801 | HLSRKASMRD | QQTDLGSVLF | VDADKSDENE | VASPSASEES | PLEPVEALRR | | 851 | RVISFDSAET | IVNKRAAGQD | VSVPSEQRKL | AETIVAMGIT | EEEFQRIYGL | | 901 | DENLKKAAMT | IDTNARNRPP | FYRHRMYGTT | TVGAFAAHVY | GFKSGGVRQM | | 951 | RAELEKLHAR | LVKEAQASSD | LTMDALERKY | NELKWDVERR | LEVAFCQAMS | | 1001 | ALVTCFQQTL | YVHTHDHRDF | GPHPLKACGI | DYLEMLTRVG | FLFSAESLLS | | 1051 | TYGNELGMLG | DTEAAVKELA | RVHVKLRPVK | SPRAATFRVS | ITSGPSGIVI | | 1101 | ELPIITRRAS | EFPDRSMHRV | PGQDAVSGAI | YLPLSTPEQK | MRAKFLFQKP | | 1151 | IRVIPVIFSQ | GLNEMQTVAN | TVGKASLQKE | INAENVVELE | SYVKNFAEWV | | 1201 | TKKQCRETSI | PIYDMEDLDR | IQTSLVALKL | SIQLSGRSKR | MAILSLSSAI | | 1251 | ARSVGGGRVT | MCKSAKDRTS | MSITLEEANL | LVRSHGLLAD | DMETFTDLLR | | 1301 | TYGVRRENAR | KNIGKAQYCF | SALQNYMLPQ | DYQCPPGTGG | GSRAYS | |
| **S26** | **PITG_00585** | | 1 | MVSTRSR**TNS** | **GSSSAAELPQ** | **K**RSATADASK | RPTKKSSTPK | AAASDLAVGK | | --- | --- | --- | --- | --- | --- | | 51 | PVTVNVTLVN | QEEKEVVIAD | TFRDQGVVFF | MYPRANTPGC | TKQACGFRDN | | 101 | IQTIKDAGFT | VYGLSGDSPK | SLANWKTKQS | LPFDLLSDPE | HKLISYFGSS | | 151 | LPGKKVQRSH | VVVLKGGVVG | EIAAK**VSPAD** | **SVSR**AVEFLA | EGNTVNFDVE | | 201 | LQTDSSATVK | VQDLFKTRGA | IFFMYSKADT | PGCTTQACGY | NDNLEAINAA | | 251 | GFDVYGLGAD | SPAELLAWKE | SQKYKYTFLS | DPKHHLIGYF | GSSINDGTRV | | 301 | ERSHVIVLPG | GKVGQIEHNI | SPQDSVTKGL | EFAKSHTVDA | ASKL | |
| **S27** | **PITG_00682** | | 1 | MLHRALKSSS | LLMPRVAAAM | PAQLARASST | MALPTSLER**L** | **FENNK**KWREG | | --- | --- | --- | --- | --- | --- | | 51 | K**KLLDPDYFD** | **K**TSQGQHPQY | LWIGCSDSRV | PAEEITGLAP | GEMFVHRNVA | | 101 | NLVVSNDISS | LSVVQYAVEH | LKVKDIIVCG | HYGCGGVHAA | VENKHLGLLD | | 151 | NWLRNIRDVV | R**IHNDELQEI** | **DDHEQR**MRR**T** | **VELNTIEQCI** | **NVFK**IGLVQR | | 201 | HQVKYGFPR**I** | **HGLVYDLK**NG | QLNEMDIDFQ | SYVRKYQSIY | K**LHSFPQGEV** | | 251 | **PLR**RSQLQGN | MIR**ALVEGHE** | **EEPGHVSAK**F | VKRAMSK**EPI** | **LFSDSEINSA** | | 301 | **IAR**AQEGEAN | NNTVDIEKLA | RYFDH |  |  | |
| **S28** | **PITG_04081** | | 1 | MRSIFYVALA | FAILCRSSAS | AALPNLDETR | **LLSDTSAKR**S | LRVAGKEVAR | | --- | --- | --- | --- | --- | --- | | 51 | GGRGEDVVRV | IVQSSNKIFK | RPADKDISKL | IAAAKKAKLE | KMKEKPSSVV | | 101 | KEVTK |  |  |  |  | |
| **S29** | **PITG_03719** | | 1 | MAASTHNMKY | **RFLGNTGLLV** | **SR**LSFGSWVT | FDNQLDFEKA | YSIMEHAYKN | | --- | --- | --- | --- | --- | --- | | 51 | GVNFFDNAEV | YANGQSELIM | GKVVKAGIER | KVWER**EDLVI** | **STK**LFFGTKS | | 101 | GPNDVGNSRK | HIVEGMKASL | KRFDLDYVDL | VFCHRPDPAT | PIEETVRAMN | | 151 | FIIEQGWAFY | WGTSEWCAK**D** | **IIEACEIADR** | LGLIRPVYDQ | PQYHILERSR | | 201 | VEYDFDVLYK | KYNYGLTTWS | PLASGILTGK | YSKGIPEGSR | LSMPSYKQML | | 251 | SNGLEEKVAK | ADKLAEVAKE | VGCSLAQLSI | AWVAANPHVS | TVILGATSIK | | 301 | QLDENLKAME | FVDKITPELR | **EKIDAIADFK** | AK**LVPQAEPH** | **VINLR**QKWL | |
| **S30** | **PITG_01904** | | 1 | MRFHCTILLA | ILAFLDSTCR | AALSSPTMER | LNVAGNNAAL | SRRFLRSTGS | | --- | --- | --- | --- | --- | --- | | 51 | NIGGMAAEER | SALSKIAGGV | AK**ISPSGHDI** | **ANK**MWLKLRT | NPEVVFKELK | | 101 | LGKTGVK**LDK** | **ITQLSCGG** |  |  |  | |
| **S31** | **PITG_05737** | | 1 | MYEGMSTPPS | DKLTQLRPRM | SDSEAKTMSN | ESRQSSVSAG | GHGAPREYDQ | | --- | --- | --- | --- | --- | --- | | 51 | EDPQRIPMMP | LMGQGAVASS | VISRLSVGSH | LSLNQLATSH | AGQLRRRPPS | | 101 | TISNKKKSFY | NAQPNAALRG | KMPHVPRHWL | NARFRHNTFF | ARRLLHTGVP | | 151 | LAFVLAAGLG | FYYFYKPDTL | TLNPDMPDVH | GFTLHSPNLV | YTFQATSCEN | | 201 | VVGFSALIYH | TLPAVILLCL | PGSGWRLFEP | FKRDEVFSPN | ASGAPDDDEE | | 251 | DNSNLTKIKR | RLVFQLCELV | AVLLLLFQAV | VVMFFLYMFF | KGGVFSCSNH | | 301 | SVQLFALVSM | MCFVWIFTEL | QYFARFREHV | KMLLGAFQES | DQTGDVRTHV | | 351 | MDPGVDQLMN | QADKALAVVR | KRLYKATRQG | DLREMRDILD | YAEAAGLTSE | | 401 | EQGFPRKSYA | PASLFLGFFA | QSRKNPVHVA | AYHGNIRALE | LLESRGFDVT | | 451 | AMDKFSRVRF | STGDLFWYFA | RFFVARPGVD | GGGSDEESAA | SIFRTTLVTP | | 501 | LHCAVSTGQL | EAVRWLLLRG | VSARTLARSS | YRSDRVPPLF | LAEHPDVVRE | | 551 | LLVHGADPLA | VPDPGFMNTL | TALQLAYLRG | NYAVAQELED | WGGDVALTPF | | 601 | HSAAGRNDVL | AVRKFLRKKT | DVDCL**GELGY** | **VGLNRRTPLH** | WAAVSGALEV | | 651 | VDLLVEAGAD | PNFQDARGRT | PLHWAARLNR | TDVLR**SLLDA** | **GADAKLVDLD** | | 701 | **YMTPMMCA**AS | GLDATREVFG | VLTSAGADIN | YQLPTTGDTA | LHIAVREENE | | 751 | QSALAILANG | GNLMKMNIEG | LRPLDCTQST | RLLFEIKRAA | GQRDVMISYT | | 801 | HSHAEFAKKI | RKALEDANVT | TWLDLMDPSG | IGGGSVWREE | IARGITNAAV | | 851 | VLCLLTEDYA | QSEWCLKELA | LAKQVGTPIL | AVSTEGVGIG | EDLQVYLYTR | | 901 | QLIPFEPAIT | QTRRNSTNVR | QIEYDYDEAK | FKAQFRLLLD | GVRDEIEKNR | | 951 | DAVQQKNIAS | NRRNNGLKQT | ATGTILATTT | GGFSRLFQQW | DPEASGAQKQ | | 1001 | FVFLSHGDKH | AGFVQQLYRE | LTDAGVVCYG | DRNVEGQDFE | NRIHATQEAI | | 1051 | LRCTCFIVIL | SKQTMNNELV | RDQLAFAEDK | GRPIFPITLN | DLDPGLDKRY | | 1101 | SLARNELFHF | MGNGMSFKPS | ADRLIQGLRR | HYTAREDNQG | TMLDNSTRIA | | 1151 | SANTSFVSFT | FSEPGTKDLD | REATGEPIIQ | EGAVLRASSD | FPRTSSEEPS | | 1201 | NEAESTTVTR | NFESISGIED | AQLDLSSTHI | RM |  | |
| **S32** | **PITG_11244** | | 1 | MAQSVSGYSV | GIDLGTTYSC | VGVWQNDR**VE** | **IIANDQGNR**T | TPSYVAFTDT | | --- | --- | --- | --- | --- | --- | | 51 | ERLIGDAAKN | QVAMNAHNTV | FDAKRLIGRK | FSDPIVQADI | KHWPFKITAG | | 101 | AGDKPQITVQ | FKGESKTFQP | EEISSMVLIK | MREVAEAFIG | KEVKNAVITV | | 151 | PAYFNDSQRQ | ATKDAGAIAG | LNVLRIINEP | TAAAIAYGLD | KKGGERNVLI | | 201 | FDLGGGTFDV | SLLSIEEGIF | EVKATAGDTH | LGGEDFDNRL | VDHFTQEFKR | | 251 | KHRKDITENQ | RALRRLRTAC | ERAKRTLSSS | AQAYIEIDSL | FDGIDFNSTI | | 301 | TRARFEDMCG | DYFRKTMEPV | EKVLRDAKLS | KSQVHEVVLV | GGSTRIPKVQ | | 351 | QLLSDFFNGK | EPNKSINPDE | AVAYGATVQA | AILSGNDSSE | KLQDLLLLDV | | 401 | TPLSLGLETA | GGVMTTLIAR | NTTVPTKKSQ | TFSTYADNQP | GVLIQVFEGE | | 451 | RSMTRDNNLL | GKFNLDGIPP | MPRGVPQIDV | TFDIDANGIL | NVSAVEKSTG | | 501 | KENK**ITITND** | **KGR**LSQADID | RMVSEAEKYK | SEDEANKVRI | EAKNALENYA | | 551 | YNLRNTLNDE | KLKDQISEDD | KKVIDDKVTE | TINWLDANQS | AEKEEYEGKQ | | 601 | KELEGVANPI | LQKMYAAAGG | APGAEGGMPG | GMPGGMPGGM | PGAAGGAPPA | | 651 | GAPDQGPKIE | EVD |  |  |  | |
| **PITG_03550** | | 1 | MAKTPSKKAA | KTVAKSGKGK | GKKRVESYST | YIYKVLRQVH | PDTGISKRGM | | --- | --- | --- | --- | --- | --- | | 51 | SIMNSFINDI | FERIASEAGK | LSRYNKKSTL | SSR**EIQTAVR** | LMLPGELAKH | | 101 | AVSEGTKAVT | KFTSA |  |  |  | |
| **S33** | **PITG_16013** | | 1 | MPDRLIHNRV | FKVSKELNRL | DLLCEQHRRQ | IGHRKGLPDW | ERPNTPAGKA | | --- | --- | --- | --- | --- | --- | | 51 | SGRRGRTPAF | FAWNEESEHT | PRPAWQPETP | QKVARTLHLT | PTRDRERDED | | 101 | MQPAPERSPY | ESVGGGNLET | TTALPSEQVE | HEGVDETSAI | EVDSDDRSVE | | 151 | EDRPVVA**ERS** | **IAVSPLR**EDI | LDRLHPPAAA | TVSSRNPTPL | STVEAASSPY | | 201 | HPPLSPRYRH | GRRLEASDAA | VPTPRAQQYA | AGVTTEQADR | FRMSRTSGKR | | 251 | FRSPAKRTTL | WGDLCDTYIH | QSGASSNQNN | SRFAHKRATP | SAAERAFGGS | | 301 | SVFRTLNMNA | **SAWPTSDSAG** | **GQRRPVVTGS** | DAMNVANHAV | RAFLAGCDDE | | 351 | TKQSEPPMQS | HLRGGESEWV | TGAVETSDQL | PSVSATGSRT | GNNRKSKRVS | | 401 | **FGGQNTRPQP** | **RT**LPVLADKT | TQTEDSLLPA | RYNVRTLPRD | TQTGDYPASV | | 451 | RCAACDSAAD | ESGRPRKIPR | GSASSIAESP | AQQHRHRQQL | ARIYPKYVRL | | 501 | RQGSDIRYRL | KFTRPPLKGK | AVTIHVRVIM | NKIGITASPP | SLVVTSKDWR | | 551 | QTREITVTSS | EDSELRTFQI | HHKIHETYDD | VYSSAAMLPS | LFVSVLQKEA | | 601 | TFLFGFGCTV | DGRLGTDGGT | NMTTPTPFAC | RWLHPLQLSC | GKAHSAIIDV | | 651 | CSNLYCFGLG | ASGQLGQGED | SLESSQEPLR | VPHLASTCVQ | YVACGSNHTL | | 701 | CLSVDGRVFS | WGDNSCGQIG | MGCKTTQIVS | TPYRVDKIVS | LRGIVCGGNQ | | 751 | SFILTKTNVL | ACGSNVAGQL | GMGDRIDRTS | FEHIPFFRKV | WEKLDLEASP | | 801 | LADGTLYAWG | FGEEGQLGLP | DEDLEPTRRV | ALLPVPVHAL | SGTGATMVSC | | 851 | GGSHTATSLV | RNSSILQDVD | AAVLVEQNPV | LSLYPLL |  | |
| **S34** | **PITG_08802** | | 1 | MLQVSQFRAL | RRASATASSS | RANAFQLTLA | RAFAAQGGDT | GVSHEDLQRA | | --- | --- | --- | --- | --- | --- | | 51 | LDKFQKESAS | KTVPWFLKNM | PPSYFRSIEE | DDRLQHLNAI | TALVNAQQPE | | 101 | VMLRSTDHRV | FSHFRSGANF | PGRLANVLDQ | LPQTVDGATL | ARVKIFTSLD | | 151 | DSLGLDIFRF | GQQEPFLNKT | EDEQLARASI | QQFCAGIQAG | KHVGDSSYPK | | 201 | PGPHFEPEAV | DTFLKHSNTM | YVQYSNPRRL | AWQMELFSQV | RGTEGVAVDV | | 251 | EHKWETRSDE | NKLGGGVPQT | MLTIAASNVI | PKGFMQKAAT | YLGLCSLNVV | | 301 | RAHLDVVKDP | QNGSAHVAMI | RILVQPSEEA | QKDHFQFEWS | KISGNLKYLK | | 351 | WVDDHPVHLT | LQHPELGLSR | AELIYAYGNM | LHGVLAKKDP | FAYSLTRIME | | 401 | TLEHPQNLPL | AWRIADFFLT | KFDPQQERVM | TDAEQDAVVE | ELKKEIRRNV | | 451 | EHEDAILLLN | SMADAVRGTL | RTNKFVRDRY | ALSLRMDPKV | MGYGTVGKDT | | 501 | PFGVFFIYGR | RFKGFHVRFR | DIARGGLRMV | YPSSTDAHAL | ESARQYNEAY | | 551 | NLAFAQQLKN | KDIPEGGSKA | VVLCDPIVGP | VGDVAPRDFI | IRKSVKAFSD | | 601 | ALLDLNTTDE | EVKAKIVDYY | GKDELIYLGP | **DENIIPGDIV** | **WMTKRAAYRG** | | 651 | **YPIP**RAFISS | KPDAGFNHKV | YGVTSEGVAV | FADVALRSQN | IDPKNQPFTV | | 701 | KITGGTDGDV | AGNVIKILHR | EYGDNVHIVG | ICDGTGVIED | PQGLDMPELL | | 751 | RLVHESLPLS | SFDESKVSSK | GIKHDINTQE | GIRARNSMHN | RVKSDLFIPA | | 801 | GGRPNTINEN | NWRDYLDADG | KPASGLIVEG | ANLFITPEAR | QLLFDNAGVV | | 851 | IVKDSSANKC | GVVCSSYEIV | ASMLLETDEF | LAVKDELVVE | VVDKLRALAR | | 901 | VEAQLLFREY | KKDPTSALPP | ASERISRAIT | RVHDAVLAHF | DDVCEEDQQI | | 951 | LFTLIEEHLP | PKLRELALDR | VQQNVPLAYI | RSIVASSLAS | KIVYREGLQF | | 1001 | TEALPDSNLG | NMALQYLKQE | KKVQQLVKDV | IADLLARGGV | RSSQLPHKGD | | 1051 | RAGLDTPN |  |  |  |  | |
| **S35** | **PITG_01700** | | 1 | MYWWPKMYKW | VGTYVRTRET | CQWTKSAPST | AAPLVSLPAP | KECWQSMSMD | | --- | --- | --- | --- | --- | --- | | 51 | FVFGLPKDKA | GNTGIVVLLD | RLSKMAHLAA | VSNTIDDDLG | KEMDAKEQTA | | 101 | IVVRFIAIVL | YFSVCAGTCW | AETKQDHVFV | AGQTLLAASY | YRVKRRQPLI | | 151 | LGDIQHTLES | ASCSPSSLLP | TSTSSVMASS | DFFREPFTVN | SKNVVYTDDE | | 201 | ITSQYTYTTT | RVEGTVATPV | DEKFTFKTQR | KIPKLGVMIV | GLGGNNGSTL | | 251 | VASIIANKHH | ITWNTK**EGVQ** | **EPNYFGSVTQ** | **ASTVR**LGTNA | NGEGVYIPFH | | 301 | NLLPMVSPNE | LVIGGWDISS | LNMAEAMKR**A** | **MVLDHDLQR**Q | LVPHLEKIKP | | 351 | LPSIYYPDFI | AANQADRADN | LLKGSK**QENL** | **DAVR**QQIRDF | KQSNSLDKVI | | 401 | VLWSANTERF | SDIVEGVNDT | SANLLESIKA | GEAELSPSTI | FAVASILEGC | | 451 | SYINGSPQNT | FVPGVLDLAE | EKK**VFVGGDD** | **FK**SGQTKIKS | VLVDFLVSAG | | 501 | IKPTSIVSYN | HLGNNDGK**NL** | **SAPQQFR**SKE | ISK**SNVVDDM** | **VASNR**LLYKE | | 551 | NEHPDHVVVI | KYVPFVGDSK | RALDEYTSKI | FMNGNNTISM | HNTCEDSLLA | | 601 | SPLILDLVLV | CELAERITLK | KEGAAEYEHM | HSVLSILSYM | LKAPLVPR**GT** | | 651 | **PVVNALFAQR** | ECMINIFRAC | VGLAPESHML | LENRLASEIN | ARQ | |
| **PITG_09400** | | 1 | MSGALGLRQQ | GVELESIMRS | VEGVERKTRI | FCTLGPSCWT | EEGLGELIDA | | --- | --- | --- | --- | --- | --- | | 51 | GMNVARFNFS | HGDHGSHAET | LNRLRAALAS | RPHKNIAIML | DTKGPEIRTG | | 101 | FLANKDKITI | KKGSTVELTT | DYEFLGDETK | IACSYPELPQ | SVKVGGSILV | | 151 | ADGSLVLTVT | EIKEDGVVTR | **ANNSATLGER** | KNMNLPGCKV | MLPTLTEKDE | | 201 | DDLVNFGLVH | GVDYIAASFV | RTGQDIDNIR | QVLGPRGRAI | KIIAKIESQE | | 251 | GLENFDEILV | K**TDGIMVAR**G | DLGMEIPPEK | VFLAQKMMIR | KANIAGKPVV | | 301 | TATQMLESMI | KAPRPTRAEC | TDVANAVLDG | TDAVMLSGET | ANGDYPTEAV | | 351 | QMMSKICVQA | EGAIHYNELY | QALHNSVLDT | YGQMDTQEAI | TSSAVK**TAID** | | 401 | **INAK**MIVVLT | ESGNTSASAL | GGTARQAEGF | NKGVTARCMG | SMIGTDSILF | | 451 | RATDLGKQFG | WVKPGDNVVA | LHGMVEARSG | STQHAQGTDC | GINRQRTHQH | | 501 | AHQGQC |  |  |  |  | |
| **S36** | **PITG_07197** | | 1 | MTLKNVYIVA | AKRTPFGNFG | GKLKDITATD | LCAHAAKATL | AAAKLDPALV | | --- | --- | --- | --- | --- | --- | | 51 | DMVQVGNVAP | TSPDGAYIAR | HVQLKAGIPQ | EKPALTINRL | CGSGFQSVVG | | 101 | GVQEILLGDA | EIALCGGAEN | MSQSPLAVYG | HQARFGVGLG | AGLNLQDTLW | | 151 | SALTDSYAK**T** | **PMGMTAENLA** | **EK**HNITR**EEC** | **DAFGLR**SQTR | WAEAQAAGWF | | 201 | DAELAPLEVK | AGR**KTEEFAV** | **DESPR**TVDLA | KLAKLKPVFK | KDGVVTAGNA | | 251 | SGISDGAGAV | LLASEEAVKK | HNLTPLARIV | SYQVSGVDPT | IMGIGPVPAI | | 301 | TGALKRAGLK | KSDIDIYDIN | EAFAAQWLSC | VKELDIDPDI | VNQSGGAIAL | | 351 | GHPLGASGSR | ITAHLAHALQ | RTGKKYAVGS | ACIGGGQGIA | LVLENAA | |
| **S37** | **PITG_23273** | | 1 | MVKLFCAIVG | VAGSAFEVDI | DQTASVSALK | KAIKEENAST | ITCDAKNLQL | | --- | --- | --- | --- | --- | --- | | 51 | FLAKAGGNAW | LSSLTEDVKE | LKKGEKTALV | KSLTQEEKEL | QGEDPLSECL | | 101 | EDMDPPKVKQ | IHVLVVVPGL | VASTVTIVIE | EAAGSKPMKE | LDYYQKCGAS | | 151 | IRKECSDYCC | EVLDKIDDIY | DMNELPLPFI | CVEGSSGMGK | SQLAFTLQGS | | 201 | RPWFYWHATR | VTDASQAMYR | NFKSMSEAFR | KVVEMDDPVA | KPMEDILNCQ | | 251 | SGIYQTVDLW | TCGFISCLLK | YSKHQSAQMI | HLEQKIEFRV | EMRTAQDVYN | | 301 | EVKKMKEENG | KQLPFFILDE | MTPNARTSVG | GKSVAAFQRN | IFRTCGLVVI | | 351 | VMGTDSKISN | LVTQATGSST | GKHMWMSVVP | KFPPYRFVFD | PKDQRDQEVW | | 401 | EAAVDWFPVV | EYIAVNSRGR | FTRSFVGEIV | KVLKRAAKQT | GDGEYSTTDQ | | 451 | VLKGSTTLSD | LDTSLALSRV | ELWNLLDEAF | AGVSRGSQIG | EVGKAFMDEK | | 501 | DGRYAQLMAI | SYTNAEETDE | EPPLKKRRLL | VGAESMHLHF | ANLVDEKVTD | | 551 | VIISNGELNM | EPRTTGPLIP | WAPQCCFPQM | DKDVLLYLAI | LGGKTHSGYY | | 601 | QYTRGGVAHS | TKFIFSETGA | FPVHENKNAV | SNEYKTYENM | VAHALFCSSR | | 651 | RHGVQGISFD | DFLECLVGEF | RDKIWEKVIL | KDLSGAVCRA | TELLASYEQR | | 701 | IRDLSTRTMP | FVAPPNAEWP | QPIIDMNVRG | CEFGHLIRAP | NSERCDIFLD | | 751 | DLGNSNERAM | FLCECKYRGD | NVDMGVLKGI | VAGLNQKWDW | KIGMLFCPQL | | 801 | ANVRAWTVPD | VDCMKIDCKT | **GNVKWVHRPN** | **AERGAPKVII** | **VIETGRGGGV** | | 851 | **VG** |  |  |  |  | |
| **S38** | **PITG_16048** | | 1 | MARTYLIGGN | WKCNGTVQSV | K**DLCALLNK**V | EITSDKVEVI | VSPPALHIDL | | --- | --- | --- | --- | --- | --- | | 51 | AKSLLQKKIA | VSAQNVSLTG | TGAYTGEIAA | EQLVDFGLEW | TITGHSERRA | | 101 | YYNETDEIVA | KKTKRALDLG | LKVIFCIGES | LEEREGNK**TM** | **DVLIR**QTQAL | | 151 | ANIVTEADWA | RIVIAYEPVW | AIGTGVVATP | AQVQEAHKDL | RGWIAGK**VSP** | | 201 | **EVAENVRIIY** | **GGSVK**GDNCE | ELIALADVDG | FLVGGAALKP | EFEKIIKSAF | |
| **S39** | **PITG_12486** | | 1 | MVKSDVYSSP | IVFSQLDLRV | GKITEVKAHP | NSERHYIETV | DIGKGEELEM | | --- | --- | --- | --- | --- | --- | | 51 | VMEHQPYFAE | EELVDRKVVV | LCNL**KMVKVV** | **RTRSTGAILL** | **VANDK**GKVEL | | 101 | LDPSPEAEIG | ERVYASGEEL | QDPVTPIQMK | KNKVWEALCK | DIKTNNKCEI | | 151 | TYLDRYPVRS | RAGPVRVESL | KKVFVTK |  |  | |
| **S40** | **PITG_00160** | | 1 | MLLCLCHERS | RQSIKPRKSD | RSSRSLSIIR | TPKVPNASNG | KTSASSNEVP | | --- | --- | --- | --- | --- | --- | | 51 | ASPVPPLMRL | LVKMTSATFE | RAKGASGIEF | DVSRDGYGCL | QIPDINARCA | | 101 | SSTEPATTPS | LSTFSHSSKV | WPPPDGYSVM | AWFR**LDSLER** | **KDDRERLYRE** | | 151 | **CFMSNTCIHC** | **RNKIQDECVL** | **KCSHRACRGC** | IEALLNSGGE | CVVCNPPMFY | | 201 | LFRFRSSDGN | SVSEAFLKGG | KLYMRTSSNR | ASAYQFSHTP | IATKQWHHVV | | 251 | FTHARQRFQP | SMVSCYLNGV | LQEHVKISYP | SGITGSQPLS | GLLGVPSQAR | | 301 | RCSSAKWMLG | PFYLLDLPVS | PPVVNAVFAA | GPSYDRLFFG | ATGNNEIGVT | | 351 | FDHLNIPNMV | MLDSYMWDPV | RSLIDSVDVE | RGGRNKLLRR | SLSLASAASS | | 401 | TAAAIVQDIK | SSSNVFARIP | SAAPLVHIPI | PSERIVVTYS | ARNGVAKELS | | 451 | MVPSSKLDGR | PSGHLMGGAT | LCEAATMADA | MFDIRSSGCQ | VAYGLLDEAS | | 501 | TAEEVELALD | LLRLCMQSNF | RNLAAMEHDH | GYGVVNYLLH | QKASLLSAQC | | 551 | LQTLFRIVGV | DFELDAPARQ | SGIEAHPSRD | SAIRNVQALQ | YFILDYSLWQ | | 601 | KVPGTDTARL | LFSTLYSCLA | RAQLQSMSFI | RQLLYVLMDP | ADDEAIRERN | | 651 | TVTDGVSRVV | VDVILVCLTS | PSRDSIVESN | FSDVTSFLAA | TLSPRFGRYR | | 701 | SEGVDDEVSV | EVFKSHTLAS | PTGRLCLSPR | GSQRMDGNTW | SEPNDREEKP | | 751 | GPTKVANAQL | ISHQAKIQEL | LLDTLVKAVH | KLDVKESREF | GEDLDKRGSD | | 801 | ASSGGPLKSV | TSSSTSSSGA | ARMQLPSASR | LTGFRKYLGM | RWIEYFLFPG | | 851 | DETEFSLRVT | PSTINAALRL | LCTLLGNSRY | ESVFKKEGYY | RLLAQGLPCN | | 901 | HAMFTTAAVN | QRFPFQKMWF | TLFGALLGTP | VDGVPAAIRL | EIDYLRKDFE | | 951 | VNIQRDRVVN | FSILNVIMVL | LRRHFNDPMA | MMSSAGDTSM | VTFVDFDAET | | 1001 | KHSTVLTPST | EQA**DIYQVEV** | **LDFLQHIF**EN | **MPSLHSF**VIS | GAEKMRQEFM | | 1051 | EELTRLICAA | ARAYLIEQYP | HSQAEVSKVL | EDKQVAVTEY | NIVVCRAELA | | 1101 | EEAAAVDSNG | SDPFLHHPVA | ASGLRLLIAQ | LMKLLLEAPN | GSDVIEEYVD | | 1151 | GTANSAVVLP | PLNSGLVLRF | QSLVVMGLLD | HVRAKFDDDD | IVAKHKHFGA | | 1201 | NVREFVKFVV | AKMHSWQHPQ | HGDGCPAVFA | CCGAAHFVGG | PSRLLEMVLF | | 1251 | VLADAHIGAC | GVNGSGLSSL | STPSSFGGML | SEKLSKGKKR | KPFRQLMDRM | | 1301 | TRSVELDTLV | SELYIALNAV | ILHVFHGRGA | EVGDEELEAM | LQQIHLHRDV | | 1351 | VFGSQSSHDK | RFLGCLCRYL | LQLLSDANVR | PLQEAAAHLW | IDLMLFQRSF | | 1401 | IDDLLTVEIR | KSGAPPYSVN | LMKNGFDVLL | ECADAPAEKR | IVQSSSFATF | | 1451 | SKWLELVGPP | LKELEGNLDR | IYIHFVVETK | EAVHETWTAY | HKKANHRKSK | | 1501 | YEKQFDARYD | WFVSMENAYI | ESLLRSQQNE | FRRQLKWEQD | RVDRQKFIAN | | 1551 | RSRYDLESSS | PRRYSWRLDF | TEGPYRMRKR | LTQMAQTLEP | SCRPGLLQRR | | 1601 | CSESDVNLRT | VSSQAKSCKT | AEPLAKRQQF | DESETGNTRQ | PATKRAFATS | | 1651 | ASSSAVLSSR | ERLRKGSFEA | LFTKYVKNER | RPSQSFRFNR | LSAGHDSIVE | | 1701 | HDDHEEEKAG | DVSGVESSAV | FESAVNSGGV | AMEDVVDEKL | RPLLMPGDEI | | 1751 | IAIYDCLRID | GMDSSPGVFL | LCNDHVYIVD | NYQRQSQPFV | SSHNDIGSEH | | 1801 | NSQTRVTEVP | QGSTTLLERR | LSWRLHESPH | HSQSVARSRD | THQCRFWAYE | | 1851 | DITELHKRRY | QLRHVALEFF | ANDGRNYLVT | LESLEQRELV | LHALLAKCPN | | 1901 | VQGAASGLDG | VSGGGDLYSQ | LRKLLRNSMT | ERWVQGDISN | FAYLMHLNTL | | 1951 | AGRSYNDLTQ | YPVFPWVLAD | YDSEILDLSD | PIVYRDLRKP | MGALQREEEF | | 2001 | RARYDGLLES | LGVADDAASD | HALSSRPFHY | GTHYSSAAIT | LHYLMRLEPF | | 2051 | TSHFRRLHGG | KFDHADRLFT | SIVGAWKSAA | GFEGAQNGTQ | DVKELIPEFY | | 2101 | YLPEFLENVN | ACVFGTSQTG | VVVGDVELPP | WANGSPTEFV | RLNRAALESP | | 2151 | YVSANLHHWI | DLIFGYKQQG | PAAVEACNIF | YHLTYEGSVD | LDAITDASTK | | 2201 | RAILDQITEF | GQTPSQLFRT | PHPVRAVAAS | TSGNIATNSS | LFGGSLGPSS | | 2251 | GPSYAQGESG | DGRRVATSPL | TARAALASSF | LEGGEIISRM | QTMLSSGPVL | | 2301 | SGTFVGTTEA | TFSPVLETSA | LLQQEPRRQV | PVNPLLAFYR | RGQQGSTSGS | | 2351 | NTNIHNIAWT | SGGVAREEKV | VVAGPKCLLI | PPRNNEYLAW | GFHDQSVKVV | | 2401 | STSSAEIGGH | GSESKVIACL | ELDVEIDVAT | ITTDGRIVIT | SSPSLPVLRV | | 2451 | **WRFNSTRRSL** | **AASLAAASGS** | **SSASATSSSA** | **AAVATSLAAA** | **SALSAPHRRR** | | 2501 | **TYTTMP**SSTR | SLTLMGSVST | PMHRNRITAL | QASRAYSVLV | SGCAGGVAVL | | 2551 | WDLNRRRFIR | QLPPICGQDD | TRVRGITTIC | INEVTGDIVV | AAGSTFGVYN | | 2601 | INGVLRVRLD | DSVVVRANGV | LRST |  |  | |
| **S41** | **PITG_20172** | | 1 | MVKLFCSIVG | VAGSAFSVEV | DEGKTVDDLK | EAIKAKKAND | FKEVDADKLQ | | --- | --- | --- | --- | --- | --- | | 51 | LFLAKKDEGR | GPWLTEEEVK | KDVIDTTGLK | LLGAARARLR | RVGLSDVDVG | | 101 | GVDEDEEVEG | RGPVNVLVVV | PEQDGTISKE | MFAATTPLTL | EQVEMSMNKV | | 151 | LRERDEKASA | YSFSDLNTAM | EEQIVKKMRL | TENIPDVKEP | VDTSIAGYSW | | 201 | IPKIVESEES | QRAGYMAYLQ | QHLKTLMDRG | DFLLDDIAGD | KSVLNIVDPR | | 251 | LPFAMKGTAD | VLLINRTSKN | PLIKLAGVSL | VIELKKKVEP | GHVPQAIGQL | | 301 | VLCSMKAPLN | CYPLSLLTDL | NDHWHFSWFS | DKHVLTQLTL | KYPKNAFRFI | | 351 | EAAVLGRTES | APPPPSFMPG | SFKIIKVDDF | LPQPVDARAE | **EMMKRYELMA** | | 401 | **DVVEPEFLMA** | **RRMDYARQLV** | **QSMP**MYSYMY | T |  | |
| **S42** | **PITG_00827** | | 1 | MAARFLNRVA | GIGATIGFGG | FCLQECIYDV | DGGHRAVIFD | RKDGILDKSV | | --- | --- | --- | --- | --- | --- | | 51 | GEGTHFKIPF | FQYPTILDVR | SNYRLISSRT | GTK**DLQNVNI** | **SLR**CLYRPNA | | 101 | DKLSHIYAEY | GPDFADR**ILP** | **SVGNEVLK**SI | VAQYDAVELL | ARRDQVSIQI | | 151 | AKEMNDRCRN | FFLLLDDVSI | THLEYGPEFT | RAVEQK**QVAQ** | **QDAER**QKFVV | | 201 | MRSEQERKAA | VIKAEGESEA | AR**LVSDAVSK** | SGSGFIEVQR | IDAAR**EIAET** | | 251 | **LAK**SRNVTYL | PNQEGGNGGV | LLGLQ |  |  | |
| **S43** | **PITG_14221** | | 1 | MGQDSAYVVV | LYYKYVRLCE | TREELKAFAA | AHDQLCSSLG | VTGRVRLALE | | --- | --- | --- | --- | --- | --- | | 51 | GINGTLGGSS | ANVQSYIDTM | KQQPQFADVD | WKTSSSRVEP | FPELHVRVVA | | 101 | EIVALELPDD | AYDLSLRGKH | LTPEQFRSEQ | LSSDAESIAL | IDVRNTYEFN | | 151 | VGHFEGALNP | KTRRFGQFPQ | WVRDELPMLQ | QKDKVLMYCT | GGIRCEKASA | | 201 | YLKHLGLENV | YQLEGGIHRY | LERFPDGGGL | FQGKNFVFDQ | RVTVASEDKT | | 251 | VTGQCERCQV | PHDTLPGTRC | AYCRMHVLLC | ESCRESAKAR | GETDEDVFCD | | 301 | EHSPLVSGSL | GDLETRFEVL | QDSLSNEQGR | GKKGRRRSLR | K**QLDTVERR**I | | 351 | QRLATA |  |  |  |  | |
| **S44** | **PITG_10334** | | 1 | MRRSALRRPE | SLTDKYRILG | KIGEGTYGMV | FKAESHSAAL | LPRPTSGGSN | | --- | --- | --- | --- | --- | --- | | 51 | AVEDEEPMTF | AIKLVKSHKE | GKNDVVLSSA | TVREIKLLRE | MHHDNVMHLH | | 101 | DVHVDPRDKS | LALVFEYGDH | DLHDIIVQSK | QKPL**GEYTRK** | **SLMYQILK**GV | | 151 | DYMHDVWVMH | RDMKPQNILV | VGHGRKRGQV | KLGDFGLARI | FKEPIKALSD | | 201 | VERVVVTLWY | RAPELLLGAK | HYTKAVDLWA | VGCIFVELIN | TRELFCGKEV | | 251 | EGSNAPFQKD | QLDKIFKVLG | MPTPQTWEGL | ENLPEYNHVV | QMGRERKYPT | | 301 | QSELKNAVKV | GPGRAGAALL | DLLSRLLEYD | PITAKEALEH | EYFKEIVRSL | | 351 | VCLFRGLV |  |  |  |  | |
| **S45** | **PITG_01470** | | 1 | MATRDVTRQF | LQLRAEEKAK | VLRRKNIVSH | REEGNALIKS | ADQESTSVAI | | --- | --- | --- | --- | --- | --- | | 51 | APGWVDVVNG | TNQHVARIK**E** | **MMEKLNK**LHT | SRLMVRFDGQ | ESKYEREIDQ | | 101 | LTQDITDEFR | SAEKGLRRMA | QSDRDGEFSA | ADAKTRQNVQ | RALATQLQTL | | 151 | SGDFRKSQKT | YLARVKNQKE | GPVEFDFLAE | NDAKQKRRGG | ADTGFTQAQI | | 201 | TEVEIAEDVI | NE**RDQEIQRI** | **ATSI**TELATI | FKELAVLVID | QGTILDRIDY | | 251 | NMEQVVEQTE | KGIEELEKAE | ETQKNSRPMK | CIGLLLVLIF | AMTLLLVLKH | | 301 | S |  |  |  |  | |
| **S46** | **PITG_17907** | | 1 | MVANNANSSA | NNGTCPTAAW | HPPTDAESTT | FRHQTSLPKL | PIPDLEGTCQ | | --- | --- | --- | --- | --- | --- | | 51 | RFLASVKALQ | TPEEQHQTER | SVK**EFLASDG** | **PR**LHQQLLDY | DKDKHSYIED | | 101 | FWYEAYLNHR | SSVVLNVNPF | FVLEDDPTPS | RNNQLSRAAS | LVLGALKFVN | | 151 | ALRRGTLEPD | MWRGNMALCM | HQYKRLFGCA | RVPSDGADDV | MVDELSKHIV | | 201 | VVCRNQFYWF | DVIWEDGVTA | ITERELLANL | KAINEDALKT | DDVEAASNAV | | 251 | GVLTTERRAK | WANLRTKLQA | KNKDTLAVID | RALFLVCLDT | TSPPDAAAFA | | 301 | ATALHGTYSI | TKDGVQTGTC | MNRWYDKLQL | IVCENGVAGC | NFEHAFVDGH | | 351 | **TVLRFVSDVF** | **TDTIIRFAQT** | **IRAGNYA**FLE | ASYRAPQLSP | SDTPGRPRVQ | | 401 | PHKLEWELDH | ELQEGIKFAE | AQLTDLMLQN | EVKVLEFTAF | GKLFITQHNM | | 451 | SPDAFVQMAF | AAAYYFQYGS | APCIYEPVLT | KRFLHGRTEA | ARAMTADALE | | 501 | FVETFFSEKT | PLEKIGSLRK | AISTHVANVR | DCAGGKGPER | HLYALECLWQ | | 551 | HEKAADNSKP | TPALFADDAW | CKLNHSVLST | SNCGNPSLRL | FGFGPVVPDG | | 601 | FGIGYIIKDE | GIQFCASSRH | RQTERYLKNL | ESYLLRVQDL | LMYEEEIRFP | | 651 | HSTAAKKKAV | QSTFKGYGFF | DDGGQPTEVK | ALASIGAVGK | PLV | |
| **S47** | **PITG_03685** | | 1 | MLPSRLSSFV | RRCASTSARN | SFVDRLRNEL | AEIEAAGTYK | NER**VIASPQG** | | --- | --- | --- | --- | --- | --- | | 51 | **AK**ISVNGDTV | LNFCANNYLG | LSNHPAVEKA | AADTLKERGF | GLSSVRFICG | | 101 | TQDIHKQLED | AISAFHGTED | TILYPSCFDA | NAGLFEAVLN | KEDAIITDEL | | 151 | NHASIIDGIR | LCK**AERHRFK** | **HMDMNDLEQK** | LKDTQHCRTR | LIATDGVFSM | | 201 | DGDVAPLQDI | MALAEKYDAQ | LFIDECHATG | FFGPTGRGSD | EYCGINGKVD | | 251 | VINSTLGKAL | GGSTGGYTTG | RKEVVDLLRQ | RSRPYLFSNS | LGPSVVGASL | | 301 | KVFEMLTESS | EFVDKIRANT | HHFRDR**MTAA** | **GYTLK**GSRDH | PIAPVMLGDA | | 351 | RLASELADDM | LKRGIYVIGF | SYPVVPKGQA | RIRVQLSAAH | SIEDVDKAVD | | 401 | AFIECGKARG | VIN |  |  |  | |
| **S48** | **PITG_06595** | | 1 | MLSRVGLTAM | RGARSMATDA | KKVTGSVGQI | TQIIGAVVDV | QFKDNLPPIL | | --- | --- | --- | --- | --- | --- | | 51 | NALEIKTQDN | TRIVLEVAQH | LGENTVR**TIA** | **MEGTDGLVRG** | **QECVDTGNPI** | | 101 | **MVPVGPETLG** | **RIMNVIGESV** | **DER**GPINAKR | HAPIHTSAPL | LTEQGSGAEI | | 151 | LVTGMK**VVDL** | **LAPYAK**GGK**I** | **GLFGGAGVGK** | TVVIMELINN | VANNHGDQRR | | 201 | RHDHGSK**AAL** | **VYGQMNEPPG** | **AR**ARVGLTGL | TVAEYFRDVE | GQDVLLFVDN | | 251 | IFRFTQACSE | VSALLGRIPS | AVGYQPTLAT | DLGALQERIT | STKKGSITSV | | 301 | QAIYVPADDL | TDPAPATTFS | HLDATTVLSR | **QISELGIYPA** | **VDPLDSK**SRM | | 351 | LDPR**IIGQEH** | **YDVAR**ATQK**L** | **LQDYK**GLQDI | IAILGMDELS | EDDKLTVARA | | 401 | RKVQKFMSQP | LHVAEVFTGK | AGK**FVPLTDT** | **ISSFK**DIIAG | NYDDLPEAAF | | 451 | YMVGGIEEVK | AKAADLAAEL | DE |  |  | |
